# Supplementary material
Source: ML conference proceedings conference paper supplement (https://proceedings.neurips.cc/paper_files/paper/2014/hash/35051070e572e47d2c26c241ab88307f-Abstract.html)
Supplement: Supplementary file [file 35051070e572e47d2c26c241ab88307f-Supplemental.zip]

## A Proofs of Theorems

In this section, we give proofs of theorems.

### A.1 Decomposition of generalization error in PU classification

Assume that  $\pi^* := p(y = 1)$  is the true class prior of the positive class. Subsequently,

$$\begin{aligned}
\mathbf{E}_{p(\mathbf{x}, y)}[\ell_{0-1}(yf(\mathbf{x}))] &= \int_{\mathbf{R}^d} \sum_y \ell_{0-1}(yf(\mathbf{x})) p(\mathbf{x}, y) d\mathbf{x} \\
&= \int_{\mathbf{R}^d} \sum_y \tilde{\ell}(yf(\mathbf{x})) \left( \frac{y+3}{2} \right) p(\mathbf{x}, y) d\mathbf{x} \\
&= \int_{\mathbf{R}^d} \sum_y \tilde{\ell}(yf(\mathbf{x})) (2p(\mathbf{x}, y = +1) + p(\mathbf{x}, y = -1)) d\mathbf{x} \\
&= \pi^* \int_{\mathbf{R}^d} \tilde{\ell}(f(\mathbf{x})) p(\mathbf{x} | y = +1) d\mathbf{x} + \int_{\mathbf{R}^d} \sum_y \tilde{\ell}(yf(\mathbf{x})) p(\mathbf{x}, y) d\mathbf{x} \\
&= \pi^* \mathbf{E}_{p(\mathbf{x}|y=+1)} [\tilde{\ell}(f(\mathbf{x}))] + \mathbf{E}_{p(\mathbf{x}, y)} [\tilde{\ell}(yf(\mathbf{x}))]. \tag{14}
\end{aligned}$$

This decomposition is the key idea of our error bounds.

### A.2 Proof of Theorem 1

Note that  $\tilde{\ell}$  maps to  $[0, 1]$ , but if  $y = +1$  it maps to  $[0, 1/2]$ . We apply *McDiarmid's inequality* and obtain

$$\Pr \left\{ \mathbf{E}_{p(\mathbf{x}|y=+1)} [\tilde{\ell}(f(\mathbf{x}))] - \frac{1}{n} \sum_{i=1}^n \tilde{\ell}(f(\mathbf{x}_i)) \geq \epsilon \right\} \leq \exp \left( -\frac{2\epsilon^2}{n(1/2n)^2} \right).$$

Equating the right-hand side of the above inequality to  $\delta/2$  gives us that with probability at least  $1 - \delta/2$ ,

$$\mathbf{E}_{p(\mathbf{x}|y=+1)} [\tilde{\ell}(f(\mathbf{x}))] - \frac{1}{n} \sum_{i=1}^n \tilde{\ell}(f(\mathbf{x}_i)) \leq \sqrt{\frac{\ln(2/\delta)}{8n}}.$$

Apply *McDiarmid's inequality* again and obtain that with probability at least  $1 - \delta/2$ ,

$$\mathbf{E}_{p(\mathbf{x}, y)} [\tilde{\ell}(yf(\mathbf{x}))] - \frac{1}{n'} \sum_{j=1}^{n'} \tilde{\ell}(y'_j f(\mathbf{x}'_j)) \leq \sqrt{\frac{\ln(2/\delta)}{2n'}}.$$

Combining these two concentration inequalities and Eq. (14) completes the proof.  $\square$

### A.3 Proof of Theorem 2

**Definition 3** ([15], Definitions 3.1 and 3.2). *Let  $\mathcal{F}$  be a class of functions. Let  $\mathbf{x}_1, \dots, \mathbf{x}_n$  be independent observations drawn according to  $p(\mathbf{x})$ , and  $\sigma_1, \dots, \sigma_n$  be independent uniformly  $\{\pm 1\}$ -valued random variables, i.e., Rademacher variables. The empirical Rademacher complexity of  $\mathcal{F}$  conditioned on  $\mathbf{x}_1, \dots, \mathbf{x}_n$  is defined by*

$$\widehat{\mathcal{R}}_n(\mathcal{F}) := \mathbf{E}_{\sigma_1, \dots, \sigma_n} \left\{ \sup_{f \in \mathcal{F}} \frac{1}{n} \sum_{i=1}^n \sigma_i f(\mathbf{x}_i) \right\},$$

and the Rademacher complexity of  $\mathcal{F}$  is defined by

$$\mathcal{R}_n(\mathcal{F}) := \mathbf{E}_{\mathbf{x}_1, \dots, \mathbf{x}_n} \left\{ \widehat{\mathcal{R}}_n(\mathcal{F}) \right\}.$$

Denote by  $\mathcal{R}_n(\mathcal{F})$  the Rademacher complexity w.r.t.  $p(\mathbf{x} \mid y = +1)$ , and  $\mathcal{R}'_{n'}(\mathcal{F})$  the Rademacher complexity w.r.t.  $p(\mathbf{x})$ . By Theorem 5.5 of [15] and the condition that  $C_k = \sup_{\mathbf{x} \in \mathcal{R}^d} \sqrt{k(\mathbf{x}, \mathbf{x})}$ , we get

$$\begin{aligned}\mathcal{R}_n(\mathcal{F}) &\leq \frac{C_\alpha C_k}{\sqrt{n}}, \\ \mathcal{R}'_{n'}(\mathcal{F}) &\leq \frac{C_\alpha C_k}{\sqrt{n'}}.\end{aligned}\tag{15}$$

Next, we need the following lemmas.

**Lemma 4.** Fix  $\eta > 0$ , then, for any  $0 < \delta < 1$  with probability at least  $1 - \delta$  over the repeated sampling of  $\{(\mathbf{x}'_1, y'_1), \dots, (\mathbf{x}'_{n'}, y'_{n'})\}$  for evaluating the empirical error, every  $f \in \mathcal{F}$  satisfies

$$\mathbf{E}_{p(\mathbf{x}, y)} [\tilde{\ell}(yf(\mathbf{x}))] - \frac{1}{n'} \sum_{j=1}^{n'} \tilde{\ell}_\eta(y'_j f(\mathbf{x}'_j)) \leq \frac{2}{\eta} \mathcal{R}'_{n'}(\mathcal{F}) + \sqrt{\frac{\ln(1/\delta)}{2n}}.$$

*Proof.* Note that both  $\tilde{\ell}$  and  $\tilde{\ell}_\eta$  map to  $[0, 1]$ ,  $\tilde{\ell}$  is lower bounded by  $\tilde{\ell}_\eta$ , and the Lipschitz constant of  $\tilde{\ell}_\eta$  is  $1/\eta$ . Hence, this lemma is essentially same as the first half of Theorem 4.4 in [15].  $\square$

**Lemma 5.** Fix  $\eta > 0$ , then, for any  $0 < \delta < 1$  with probability at least  $1 - \delta$  over the repeated sampling of  $\{\mathbf{x}_1, \dots, \mathbf{x}_n\}$  for evaluating the empirical error, every  $f \in \mathcal{F}$  satisfies

$$\mathbf{E}_{p(\mathbf{x}|y=+1)} [\tilde{\ell}(f(\mathbf{x}))] - \frac{1}{n} \sum_{i=1}^n \tilde{\ell}_\eta(f(\mathbf{x}_i)) \leq \frac{1}{\eta} \mathcal{R}_n(\mathcal{F}) + \sqrt{\frac{\ln(1/\delta)}{8n}}.$$

*Proof.* If we fix  $y = +1$ , both  $\tilde{\ell}$  and  $\tilde{\ell}_\eta$  map to  $[0, 1/2]$ , and the Lipschitz constant of  $\tilde{\ell}_\eta$  is  $1/(2\eta)$ . Then, the proof of this lemma is analogous with the proof of the first half of Theorem 4.4 in [15], while there are two difference points:

- When applying Theorem 3.1 of [15], note that both  $\tilde{\ell}$  and  $\tilde{\ell}_\eta$  map to  $[0, 1/2]$ , and consequently McDiarmid's inequality results in a tighter bound;
- When applying Lemma 4.2 of [15], note that  $\tilde{\ell}_\eta$  is  $(1/(2\eta))$ -Lipschitz continuous, and thus the contraction of Rademacher averages results in a tighter bound.  $\square$

By Lemma 5 and (15), with probability at least  $1 - \delta/2$  over the repeated sampling of  $\{\mathbf{x}_1, \dots, \mathbf{x}_n\}$ ,

$$\mathbf{E}_{p(\mathbf{x}|y=+1)} [\tilde{\ell}(f(\mathbf{x}))] - \frac{1}{n} \sum_{i=1}^n \tilde{\ell}_\eta(f(\mathbf{x}_i)) \leq \frac{C_\alpha C_k}{\eta \sqrt{n}} + \sqrt{\frac{\ln(2/\delta)}{8n}}.$$

Similarly, by Lemma 4 and (15), with probability at least  $1 - \delta/2$  over the repeated sampling of  $\{(\mathbf{x}'_1, y'_1), \dots, (\mathbf{x}'_{n'}, y'_{n'})\}$ ,

$$\mathbf{E}_{p(\mathbf{x}, y)} [\tilde{\ell}(yf(\mathbf{x}))] - \frac{1}{n'} \sum_{j=1}^{n'} \tilde{\ell}_\eta(y'_j f(\mathbf{x}'_j)) \leq \frac{2C_\alpha C_k}{\eta \sqrt{n'}} + \sqrt{\frac{\ln(2/\delta)}{2n'}}.$$

Combining these two concentration inequalities and Eq. (14) completes the proof.  $\square$
